# Supplementary material for: Long-term relative survival in uveal melanoma: a systematic review and meta-analysis
Source: PubMed Central journal article supplement (PMC9053233; doi:10.1038/s43856-022-00082-y), 2022-03-01
Supplement: 43856_2022_82_MOESM1_ESM.pdf [file 43856_2022_82_MOESM1_ESM.pdf]

Supplementary tables to

# **Long-term relative survival in uveal melanoma: a systematic review and meta-analysis**

Gustav Stålhammar M.D. Ph.D.<sup>1,2</sup> Christina Herrspiegel M.D.<sup>1,2</sup>

<sup>1</sup>St. Erik Eye Hospital, Box 4078, 171 04 Solna, Stockholm, Sweden,

<sup>2</sup>Department of Clinical Neuroscience, Karolinska Institutet, Tomtebodavägen 18A, plan 5, 171 77 Stockholm, Sweden.

## **Table of contents:**

|                     |                                                                                                                        |
|---------------------|------------------------------------------------------------------------------------------------------------------------|
| <i>Page 2</i> ..... | Supplementary table 1. Estimations of relative survival in a Finnish cohort published by Kujala <i>et al.</i>          |
| <i>Page 3</i> ..... | Supplementary table 2. Data collection methods for included studies.                                                   |
| <i>Page 4</i> ..... | Supplementary table 3. Combined estimate of relative survival rates 1 through 30 years after uveal melanoma diagnosis. |
| <i>Page 5</i> ..... | Supplementary table 4. Estimates of variance of relative survival in included studies.                                 |

| <b>Year after diagnosis</b> | <b>All-cause mortality</b> | <b>Melanoma-related mortality</b> | <b>Expected survival Swedish reference population</b> | <b>Relative survival</b> | <b>95 % CI upper of observed survival rate</b> | <b>95 % CI lower of observed survival rate</b> | <b>Standard error of observed survival rate</b> | <b>95 % CI upper of relative survival rate</b> | <b>95 % CI lower of relative survival rate</b> | <b>1 minus relative survival</b> |
|-----------------------------|----------------------------|-----------------------------------|-------------------------------------------------------|--------------------------|------------------------------------------------|------------------------------------------------|-------------------------------------------------|------------------------------------------------|------------------------------------------------|----------------------------------|
| 5                           | 0.62                       | 0.69                              | 0.98                                                  | 0.63                     | 0.68                                           | 0.56                                           | 0.03                                            | 0.66                                           | 0.60                                           | 0.37                             |
| 10                          | 0.47                       | 0.60                              | 0.82                                                  | 0.57                     | 0.52                                           | 0.41                                           | 0.03                                            | 0.61                                           | 0.54                                           | 0.43                             |
| 15                          | 0.35                       | 0.55                              | 0.65                                                  | 0.54                     | 0.40                                           | 0.29                                           | 0.03                                            | 0.58                                           | 0.50                                           | 0.46                             |
| 20                          | 0.25                       | 0.52                              | 0.50                                                  | 0.50                     | 0.30                                           | 0.20                                           | 0.03                                            | 0.55                                           | 0.45                                           | 0.50                             |
| 25                          | 0.21                       | 0.51                              | 0.34                                                  | 0.62                     | 0.26                                           | 0.16                                           | 0.03                                            | 0.69                                           | 0.54                                           | 0.38                             |
| 30                          | 0.18                       | 0.50                              | 0.22                                                  | 0.82                     | 0.22                                           | 0.13                                           | 0.02                                            | 0.92                                           | 0.71                                           | 0.18                             |

**Supplementary table 1.** Estimations of relative survival in the Finnish cohort published by Kujala *et al.* (Kujala E, Mäkitie T, Kivelä T. Very long-term prognosis of patients with malignant uveal melanoma. Invest Ophthalmol Vis Sci. 2003;44(11):4651-9.)

| # | Data collection method                                                                                                  | <i>n</i> (%) |
|---|-------------------------------------------------------------------------------------------------------------------------|--------------|
| 1 | Population-based registries outside the authors' institution, including cancer registries and cause of death registries | 4 (44)       |
| 2 | Institution's clinical records                                                                                          | 0 (0)        |
| 3 | Combination of 1 and 2                                                                                                  | 5 (55)       |
| 4 | Other                                                                                                                   | 0 (0)        |

**Supplementary table 2.** Data collection methods for included studies.

| <b>Year after diagnosis</b> | <b>Relative survival, %</b> |
|-----------------------------|-----------------------------|
| 1                           | 95                          |
| 2                           | 90                          |
| 3                           | 86                          |
| 4                           | 82                          |
| 5                           | 79                          |
| 6                           | 76                          |
| 7                           | 73                          |
| 8                           | 70                          |
| 9                           | 68                          |
| 10                          | 66                          |
| 11                          | 64                          |
| 12                          | 63                          |
| 13                          | 62                          |
| 14                          | 61                          |
| 15                          | 60                          |
| 16                          | 60                          |
| 17                          | 59                          |
| 18                          | 59                          |
| 19                          | 59                          |
| 20                          | 60                          |
| 21                          | 60                          |
| 22                          | 60                          |
| 23                          | 61                          |
| 24                          | 62                          |
| 25                          | 62                          |
| 26                          | 63                          |
| 27                          | 64                          |
| 28                          | 65                          |
| 29                          | 66                          |
| 30                          | 67                          |

**Supplementary table 3.** Combined estimate of relative survival rates 1 through 30 years after uveal melanoma diagnosis.

| Variance statistic | 5 years | 10 years | 15 years | 20 years | 25 years | 30 years |
|--------------------|---------|----------|----------|----------|----------|----------|
| Tau <sup>2</sup>   | 0.01    | 0.01     | 0.01     | 0.01     | 0.01     | 0.02     |
| Chi <sup>2</sup>   | 241     | 72       | 39       | 13       | 4        | 14       |
| I <sup>2</sup>     | 97 %    | 94 %     | 92 %     | 85 %     | 48 %     | 86 %     |

**Supplementary table 4.** Estimates of variance of relative survival in included studies.
