# Supplementary material for: Long-term relative survival in uveal melanoma: a systematic review and meta-analysis
Source: PubMed Central journal article supplement (PMC9053233; doi:10.1038/s43856-022-00082-y), 2022-03-01
Supplement: 43856_2022_82_MOESM5_ESM.pdf [file 43856_2022_82_MOESM5_ESM.pdf]

## **Description of Additional Supplementary Files**

**File Name:** Supplementary Data 1

**Description:** Source data used to generate figure 2

**File Name:** Supplementary Data 2

**Description:** Source data used to generate figure 3
